# Supplementary material
Source: publisher figshare collection journal article supplement (https://future-science-group.figshare.com/ndownloader/files/33851519)
Supplement: Supplementary file 1 [file 33851519]

# Supplementary Material 5 Case study parameters

Product (P) demand at location h at year t (with fast track)

|  |  | Phase 1 | | Phase 2/3 | | | Reg | Ramp up | | | Market demand |
| --- | --- | --- | --- | --- | --- | --- | --- | --- | --- | --- | --- |
| Year (t) | base | 1 | 2 | 3 | 4 | 5 | 6 | 7 | 8 | 9 | 10-20 |
| P1.London | 0 | 4 | 4 | 10 | 12 | 12 | 24 | 50 | 100 | 150 | 200 |
| P1.Bristol | 0 | 2 | 2 | 5 | 6 | 6 | 12 | 25 | 50 | 75 | 100 |
| P1.Newcastle | 0 | 2 | 2 | 5 | 6 | 6 | 12 | 25 | 50 | 75 | 100 |
| P1.Edinburgh | 0 | 2 | 2 | 5 | 6 | 6 | 12 | 25 | 50 | 75 | 100 |
| P2.London | 0 | 4 | 4 | 10 | 12 | 12 | 5 | 10 | 20 | 30 | 40 |
| P2.Bristol | 0 | 2 | 2 | 5 | 6 | 6 | 2 | 5 | 10 | 15 | 20 |
| P2.Newcastle | 0 | 2 | 2 | 5 | 6 | 6 | 2 | 5 | 10 | 15 | 20 |
| P2.Edinburgh | 0 | 2 | 2 | 5 | 6 | 6 | 2 | 5 | 10 | 15 | 20 |
| P3.London | 0 | 4 | 4 | 10 | 16 | 16 | 10 | 20 | 40 | 60 | 80 |
| P3.Bristol | 0 | 2 | 2 | 5 | 8 | 8 | 5 | 10 | 20 | 30 | 40 |
| P3.Newcastle | 0 | 2 | 2 | 5 | 8 | 8 | 5 | 10 | 20 | 30 | 40 |
| P3.Edinburgh | 0 | 2 | 2 | 5 | 8 | 8 | 5 | 10 | 20 | 30 | 40 |
| P4.London | 0 | 4 | 4 | 10 | 12 | 12 | 80 | 210 | 420 | 630 | 840 |
| P4.Bristol | 0 | 2 | 2 | 5 | 6 | 6 | 40 | 105 | 210 | 315 | 420 |
| P4.Newcastle | 0 | 2 | 2 | 5 | 6 | 6 | 40 | 105 | 210 | 315 | 420 |
| P4.Edinburgh | 0 | 2 | 2 | 5 | 6 | 6 | 40 | 105 | 210 | 315 | 420 |
| P5.London | 0 | 4 | 4 | 10 | 20 | 20 | 200 | 550 | 1100 | 1650 | 2200 |
| P5.Bristol | 0 | 2 | 2 | 5 | 10 | 10 | 100 | 275 | 550 | 825 | 1100 |
| P5.Newcastle | 0 | 2 | 2 | 5 | 10 | 10 | 100 | 275 | 550 | 825 | 1100 |
| P5.Edinburgh | 0 | 2 | 2 | 5 | 10 | 10 | 100 | 275 | 550 | 825 | 1100 |

Product (P) demand at location h at year t (without fast track)

|  |  | Phase 1 | | Phase 2 | | Phase 3 | | | Reg | Ramp up | | | Market demand |
| --- | --- | --- | --- | --- | --- | --- | --- | --- | --- | --- | --- | --- | --- |
| Year (t) | base | 1 | 2 | 3 | 4 | 5 | 6 | 7 | 8 | 9 | 10 | 11 | 12-20 |
| P1.London | 0 | 4 | 4 | 10 | 10 | 12 | 12 | 12 | 0 | 50 | 100 | 150 | 200 |
| P1.Bristol | 0 | 2 | 2 | 5 | 5 | 6 | 6 | 6 | 0 | 25 | 50 | 75 | 100 |
| P1.Newcastle | 0 | 2 | 2 | 5 | 5 | 6 | 6 | 6 | 0 | 25 | 50 | 75 | 100 |
| P1.Edinburgh | 0 | 2 | 2 | 5 | 5 | 6 | 6 | 6 | 0 | 25 | 50 | 75 | 100 |
| P2.London | 0 | 4 | 4 | 10 | 10 | 12 | 12 | 12 | 0 | 10 | 20 | 30 | 40 |
| P2.Bristol | 0 | 2 | 2 | 5 | 5 | 6 | 6 | 6 | 0 | 5 | 10 | 15 | 20 |
| P2.Newcastle | 0 | 2 | 2 | 5 | 5 | 6 | 6 | 6 | 0 | 5 | 10 | 15 | 20 |
| P2.Edinburgh | 0 | 2 | 2 | 5 | 5 | 6 | 6 | 6 | 0 | 5 | 10 | 15 | 20 |
| P3.London | 0 | 4 | 4 | 10 | 10 | 16 | 16 | 16 | 0 | 20 | 40 | 60 | 80 |
| P3.Bristol | 0 | 2 | 2 | 5 | 5 | 8 | 8 | 8 | 0 | 10 | 20 | 30 | 40 |
| P3.Newcastle | 0 | 2 | 2 | 5 | 5 | 8 | 8 | 8 | 0 | 10 | 20 | 30 | 40 |
| P3.Edinburgh | 0 | 2 | 2 | 5 | 5 | 8 | 8 | 8 | 0 | 10 | 20 | 30 | 40 |
| P4.London | 0 | 4 | 4 | 10 | 10 | 12 | 12 | 12 | 0 | 210 | 420 | 630 | 840 |
| P4.Bristol | 0 | 2 | 2 | 5 | 5 | 6 | 6 | 6 | 0 | 105 | 210 | 315 | 420 |
| P4.Newcastle | 0 | 2 | 2 | 5 | 5 | 6 | 6 | 6 | 0 | 105 | 210 | 315 | 420 |
| P4.Edinburgh | 0 | 2 | 2 | 5 | 5 | 6 | 6 | 6 | 0 | 105 | 210 | 315 | 420 |
| P5.London | 0 | 4 | 4 | 10 | 10 | 20 | 20 | 20 | 0 | 550 | 1100 | 1650 | 2200 |
| P5.Bristol | 0 | 2 | 2 | 5 | 5 | 10 | 10 | 10 | 0 | 275 | 550 | 825 | 1100 |
| P5.Newcastle | 0 | 2 | 2 | 5 | 5 | 10 | 10 | 10 | 0 | 275 | 550 | 825 | 1100 |
| P5.Edinburgh | 0 | 2 | 2 | 5 | 5 | 10 | 10 | 10 | 0 | 275 | 550 | 825 | 1100 |
